# Supplementary material
Source: PubMed Central journal article supplement (PMC8725652)
Supplement: NIHMS1557085-supplement-Fig_2.pdf [file NIHMS1557085-supplement-Fig_2.pdf]

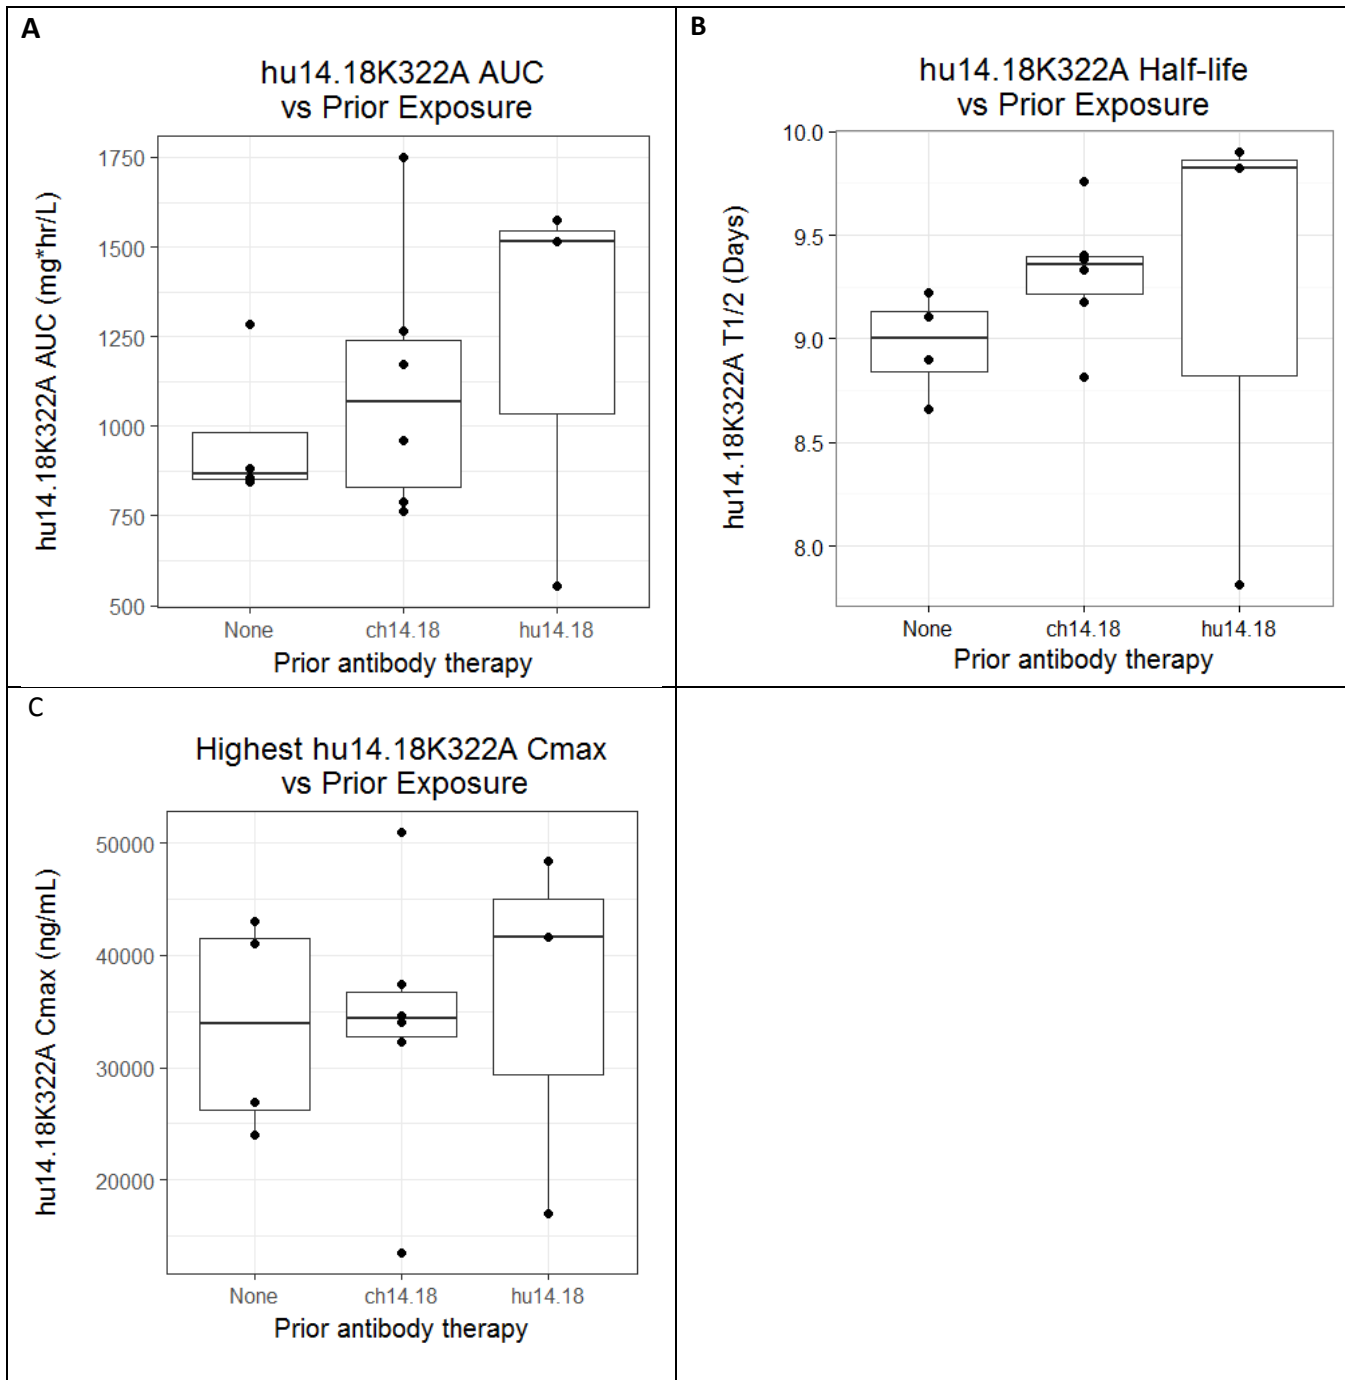

**Supplementary figure 2.** This figure demonstrates the relationship between prior treatment with chimeric or humanized 14.18 K322A antibody and A) the area under the concentration curve for the antibody (AUC); B) elimination half-life of the antibody (T<sub>1/2</sub> Beta); and C) the highest observed concentration of the antibody (C<sub>max</sub>). Although the data in panels A and B suggest that prior exposure to ch14.18 or hu14.18K322A tends to increase the AUC and the elimination half-life, there is no significant difference between prior treatment groups using the Kruskal-Wallis non-parametric test. The data in panel C do not suggest an association between prior exposure and the peak serum concentration of the hu14.18K322A antibody.
