# Supplementary material
Source: PubMed Central journal article supplement (PMC8725652)
Supplement: NIHMS1557085-supplement-Fig_4.pdf [file NIHMS1557085-supplement-Fig_4.pdf]

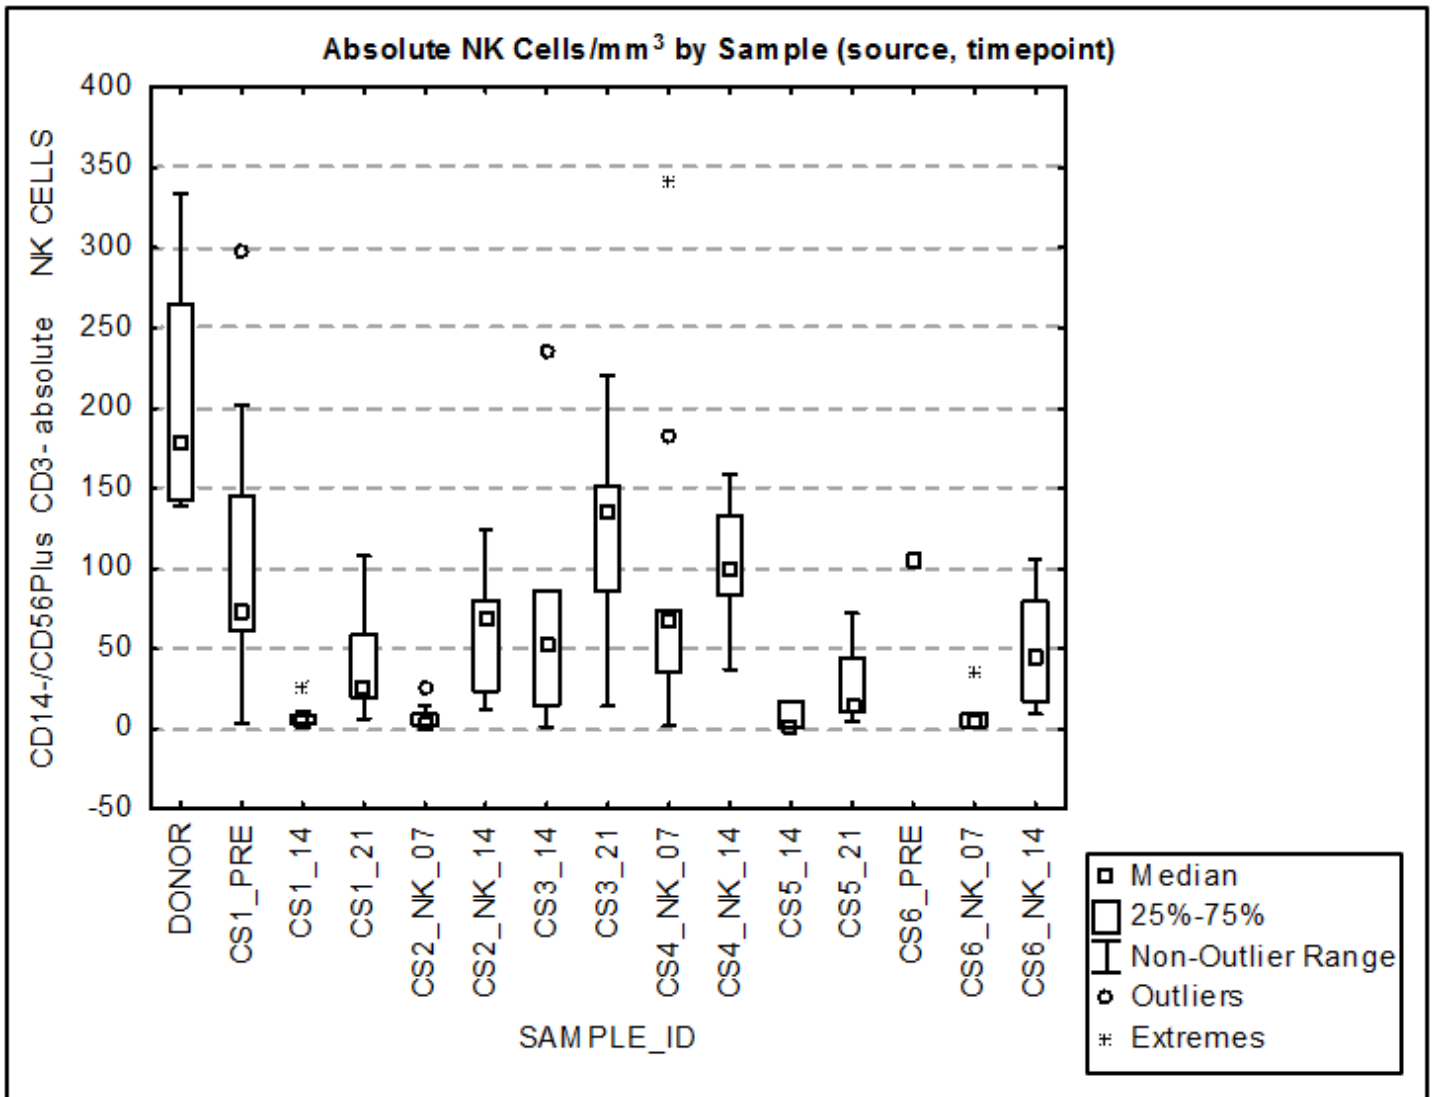

**Supplementary Figure 4.** Box and whisker plot showing absolute NK cells per mm<sup>3</sup> in samples. NK cells were identified by flow cytometry as CD14 negative, CD56 positive, CD3 negative and percentage of total WBC was computed from flow cytometry results. Absolute WBC count was obtained using a Sysmex™ KX-21 blood cell analyzer, and final absolute NK count was obtained by multiplying percent NK by absolute WBC. Sample identifiers and associated N are: **DONOR** (N=10) blood sample drawn at or before time of first NK cell donation; **CS1\_PRE** (N=13), Patient blood drawn prior to first treatment course; **CS1\_14** (N=9); Patient on day +14 of first treatment course; **CS1\_21** (N=14), Patient on day +21 of first treatment course; **CS2\_NK\_07** (N=11), Patient on day +7 following NK cell administration in second treatment course; **CS2\_NK\_14** (N=11), Patient on day +14 following NK cell administration in second treatment course; **CS3\_14** (N=7), Patient on day +14 of third treatment course; **CS3\_21** (N=9), Patient on day +21 of third treatment course; **CS4\_NK\_07** (N=9), Patient on day +7 following NK cell administration in fourth treatment course; **CS4\_NK\_14** (N=10), Patient on day +14 following NK cell administration in fourth treatment course; **CS5\_14** (N=3), Patient on day +14 of fifth treatment course; **CS5\_21** (N=8), Patient on day +21 of fifth treatment course; **CS6\_PRE** (N=1), Patient blood drawn prior to initiation of 6<sup>th</sup> treatment course; **CS6\_NK\_07** (N=7), Patient on day +7 following NK cell administration in sixth treatment course; **CS6\_NK\_14** (N=7), Patient on day +14 following NK cell administration in sixth treatment course. **Central Point (□)** – median; **Box** – Inner quartiles (25<sup>th</sup> percentile to 75<sup>th</sup> percentile) of data; **Whiskers** – non-outlier min and max data; **Outliers (○)** – data points outside of median ± inner quartile range; **Extreme Outliers (\*)** – data points outside of median ± 1.5 X inner quartile range.
