# Supplementary material
Source: PubMed Central journal article supplement (PMC8725652)
Supplement: NIHMS1557085-supplement-table3.pdf [file NIHMS1557085-supplement-table3.pdf]

**Supplementary table 3.** Donor characteristics, dose and chimerism of NK cells infused.

| Pt. #,<br>gender | Course<br># | Donor<br>Gender | Donor<br>Age | KIR2DL1  | KIR2DL2/3 | KIR3DL1  | KIR Results<br>(# of loci) | Number of NK<br>Cells Infused<br>(x10 <sup>6</sup> /kg) | Day +14<br>Chimerism<br>% Engraftment<br>(% donor derived) | Day +21<br>Chimerism<br>% Engraftment<br>(% donor derived) |
|------------------|-------------|-----------------|--------------|----------|-----------|----------|----------------------------|---------------------------------------------------------|------------------------------------------------------------|------------------------------------------------------------|
| 1, male          | 2           | Female          | 29           | Match    | Match     | Mismatch | Mismatch (1)               | 12.4                                                    | 2                                                          | 0                                                          |
|                  | 4           |                 |              |          |           |          |                            | 6.2                                                     | 0                                                          | 0                                                          |
|                  | 6           |                 |              |          |           |          |                            | 8.3                                                     | insufficient                                               | 0                                                          |
| 2, female        | 2           | Female          | 39           | Match    | Match     | Mismatch | Mismatch (1)               | 19.1                                                    | 0                                                          | 0                                                          |
|                  | 4           |                 |              |          |           |          |                            | 37.1                                                    | 0                                                          | 0                                                          |
|                  | 6           |                 |              |          |           |          |                            | 27.1                                                    | 0                                                          | 0                                                          |
| *3, female       | N/A         | N/A             | N/A          | N/A      | N/A       | N/A      | N/A                        | N/A                                                     | N/A                                                        | N/A                                                        |
| 4, male          | 2           | Female          | 32           |          |           |          | Matched                    | 14.7                                                    | 4                                                          | 0                                                          |
|                  | 4           |                 |              |          |           |          |                            | 13.2                                                    | 5                                                          | 0                                                          |
| 5, male          | 2           | Female          | 39           | Mismatch | Match     | Match    | Mismatch (1)               | 6.8                                                     | 50                                                         | 44                                                         |
|                  | 4           |                 |              |          |           |          |                            | 8.4                                                     | insufficient                                               | 27                                                         |
|                  | 6           |                 |              |          |           |          |                            | 4.7                                                     | 27                                                         | 31                                                         |
| 6, female        | 2           | Female          | 30           | Mismatch | Match     | Mismatch | Mismatch (2)               | 10.5                                                    | insufficient                                               | 1                                                          |
|                  | 4           |                 |              |          |           |          |                            | 7.7                                                     | 23                                                         | 7                                                          |
| 7, female        | 2           | Male            | 42           | Mismatch | Match     | Match    | Mismatch (1)               | 19.3                                                    | 0                                                          | 0                                                          |
| *8, female       | N/A         | N/A             | N/A          | N/A      | N/A       | N/A      | N/A                        | N/A                                                     | N/A                                                        | N/A                                                        |
| 9, male          | 2           | Female          | 31           | Match    | Match     | Match    | Matched                    | 9.1                                                     | 0                                                          | 0                                                          |
|                  | 4           |                 |              |          |           |          |                            | 14.6                                                    | not collected                                              | 0                                                          |
|                  | 6           |                 |              |          |           |          |                            | 13.5                                                    | not collected                                              | not collected                                              |
| 10, female       | 2           | Male            | 35           | Mismatch | Match     | Mismatch | Mismatch (2)               | 47.8                                                    | 100                                                        | 0                                                          |
|                  | 4           |                 |              |          |           |          |                            | 47.3                                                    | 0                                                          | 0                                                          |
|                  | 6           |                 |              |          |           |          |                            | 59.5                                                    | insufficient                                               | 0                                                          |
| 11, male         | 2           | Female          | 43           | Mismatch | Match     | Mismatch | Mismatch (2)               | 11                                                      | 15                                                         | 0                                                          |
|                  | 4           |                 |              |          |           |          |                            | 48.6                                                    | 0                                                          | 0                                                          |
|                  | 6           |                 |              |          |           |          |                            | 34.8                                                    | insufficient                                               | 0                                                          |
| 12, female       | 4           | Female          | 33           | Match    | Mismatch  | Match    | Mismatch (1)               | 23.8                                                    | 2                                                          | 0                                                          |
|                  | 6           |                 |              |          |           |          |                            | 15.5                                                    | 1                                                          | 0                                                          |
|                  | 8           |                 |              |          |           |          |                            | 21.2                                                    | not collected                                              | not collected                                              |
| 13, female       | 2           | Female          | 37           | Mismatch | Match     | Mismatch | Mismatch (2)               | 41.6                                                    | 39                                                         | 0                                                          |
|                  | 4           |                 |              |          |           |          |                            | 48                                                      | 1                                                          | 1                                                          |
|                  | 6           |                 |              |          |           |          |                            | 52.2                                                    | 9                                                          | 1                                                          |

\*Two patients did not receive donor NK cells.
