# Supplementary material
Source: PubMed Central journal article supplement (PMC8725652)
Supplement: NIHMS1557085-supplement-table_1.pdf [file NIHMS1557085-supplement-table_1.pdf]

**Supplementary table 1.** Individual pharmacokinetic parameters in 3 subpopulations (no prior 14.18 mAb, prior dinutuximab mAb, prior hu14.18K322A mAb).

| ID                             | BSA (m <sup>2</sup> ) | CL (L/day)/m <sup>2</sup> | V1 (L)/ m <sup>2</sup> | AUC (mg*hr/L)   | AUC (ng*hr/L)/mg | C <sub>max</sub> (ng/mL) | C <sub>max</sub> (ng/mL)/(mg/m <sup>2</sup> ) | C <sub>end</sub> (ng/mL) | C <sub>end</sub> (ng/mL)/(mg/m <sup>2</sup> ) | T1/2 Alpha (Days) | T1/2 Beta (Days) |
|--------------------------------|-----------------------|---------------------------|------------------------|-----------------|------------------|--------------------------|-----------------------------------------------|--------------------------|-----------------------------------------------|-------------------|------------------|
| <b>No prior 14.18 mAb</b>      |                       |                           |                        |                 |                  |                          |                                               |                          |                                               |                   |                  |
| 2                              | 0.78                  | 1.164                     | 2.94                   | 846             | 20.6             | 26918                    | 656                                           | 392                      | 9.6                                           | 1.5               | 8.7              |
| 10                             | 0.69                  | 0.986                     | 2.53                   | 882             | 24.3             | 43063                    | 1189                                          | 180                      | 5.0                                           | 1.4               | 9.1              |
| 13                             | 0.92                  | 0.751                     | 2.55                   | 1285            | 31.9             | 40998                    | 1019                                          | 642                      | 16.0                                          | 1.9               | 9.2              |
| 27                             | 0.67                  | 1.131                     | 2.68                   | 855             | 21.2             | 23995                    | 595                                           | 445                      | 11.0                                          | 1.3               | 8.9              |
| <b>Median</b>                  | <b>0.74</b>           | <b>1.058</b>              | <b>2.62</b>            | <b>869</b>      | <b>22.8</b>      | <b>33958</b>             | <b>838</b>                                    | <b>419</b>               | <b>10.3</b>                                   | <b>1.5</b>        | <b>9.0</b>       |
| <b>Prior dinutuximab mAb</b>   |                       |                           |                        |                 |                  |                          |                                               |                          |                                               |                   |                  |
| 4                              | 0.86                  | 0.751                     | 2.47                   | 1264            | 32.0             | 34630                    | 876                                           | 306                      | 7.7                                           | 1.8               | 9.3              |
| 16                             | 0.58                  | 0.990                     | 2.33                   | 961             | 24.2             | 50908                    | 1284                                          | 330                      | 8.3                                           | 1.3               | 9.4              |
| 21                             | 1.05                  | 0.549                     | 2.33                   | 1749            | 43.7             | 32335                    | 808                                           | 1090                     | 27.3                                          | 2.2               | 9.8              |
| 24                             | 0.73                  | 0.819                     | 2.38                   | 1172            | 29.3             | 34070                    | 852                                           | 551                      | 13.8                                          | 1.6               | 9.4              |
| 29                             | 0.65                  | 1.219                     | 2.75                   | 788             | 19.7             | 13543                    | 339                                           | 381                      | 9.5                                           | 1.3               | 8.8              |
| 32                             | 0.49                  | 1.256                     | 2.41                   | 764             | 19.1             | 37460                    | 937                                           | 238                      | 6.0                                           | 1.1               | 9.2              |
| <b>Median</b>                  | <b>0.69</b>           | <b>0.905</b>              | <b>2.39</b>            | <b>1066</b>     | <b>26.8</b>      | <b>34350</b>             | <b>864</b>                                    | <b>356</b>               | <b>8.9</b>                                    | <b>1.4</b>        | <b>9.4</b>       |
| <b>Prior hu14.18 K322A mAb</b> |                       |                           |                        |                 |                  |                          |                                               |                          |                                               |                   |                  |
| 1                              | 0.80                  | 0.633                     | 2.23                   | 1517            | 37.9             | 41644                    | 1041                                          | 880                      | 22.0                                          | 1.8               | 9.9              |
| 3                              | 1.52                  | 1.705                     | 5.23                   | 556             | 14.1             | 16985                    | 430                                           | 148                      | 3.7                                           | 2.0               | 7.8              |
| 18                             | 0.87                  | 0.612                     | 2.29                   | 1577            | 39.2             | 48325                    | 1201                                          | 731                      | 18.2                                          | 1.9               | 9.8              |
| <b>Median</b>                  | <b>0.87</b>           | <b>0.633</b>              | <b>2.29</b>            | <b>1517</b>     | <b>37.9</b>      | <b>41644</b>             | <b>1041</b>                                   | <b>731</b>               | <b>18.2</b>                                   | <b>1.9</b>        | <b>9.8</b>       |
| <b>All patients combined</b>   |                       |                           |                        |                 |                  |                          |                                               |                          |                                               |                   |                  |
| <b>Median</b>                  | <b>0.78</b>           | <b>0.99</b>               | <b>2.47</b>            | <b>961</b>      | <b>24.3</b>      | <b>34630</b>             | <b>876</b>                                    | <b>392</b>               | <b>9.6</b>                                    | <b>1.6</b>        | <b>9.2</b>       |
| <b>Range</b>                   | <b>0.49-1.52</b>      | <b>0.55-1.71</b>          | <b>2.23-5.23</b>       | <b>556-1749</b> | <b>14.1-43.7</b> | <b>13543-50908</b>       | <b>339-1284</b>                               | <b>148-1090</b>          | <b>3.7-27.3</b>                               | <b>1.1-2.2</b>    | <b>7.8-9.9</b>   |
