# Supplementary material
Source: PubMed Central journal article supplement (PMC8725652)
Supplement: NIHMS1557085-supplement-table_2.pdf [file NIHMS1557085-supplement-table_2.pdf]

**Supplementary table 2.** Human anti-human antibody (HAHA) level and peak hu14.18K322A serum level by course and prior antibody therapy.

|                                | Course        | 1               | 1                         | 2             | 2               | 3                       | 3                         | 4             | 4                         | 5                       | 5                         | 6             | 6                |
|--------------------------------|---------------|-----------------|---------------------------|---------------|-----------------|-------------------------|---------------------------|---------------|---------------------------|-------------------------|---------------------------|---------------|------------------|
|                                | Patient ID    | Pre HAHA        | Peak <sub>D16</sub> K322A | Pre HAHA      | Pre Peak K322A  | Pre <sub>D16</sub> HAHA | Peak <sub>pre</sub> K322A | Pre HAHA      | Peak <sub>D16</sub> K322A | Pre <sub>pre</sub> HAHA | Peak <sub>D16</sub> K322A | Pre HAHA      | Peak K322A       |
| <b>No prior 14.18 mAb</b>      |               |                 |                           |               |                 |                         |                           |               |                           |                         |                           |               |                  |
|                                | *2            | 1.22            | 4.2                       | 2.26          | 13.9            | 0.65                    | 17.4                      | 1.34          | 35.5                      | 1.31                    | 24.7                      | 1.25          | 13.7             |
|                                | 5             | 0               | 21.2                      | 0.06          | 24.4            | 0.04                    | 8.3                       | N/A           | N/A                       | N/A                     | N/A                       | N/A           | N/A              |
|                                | 6             | 3.01            | 22.5                      | 2.36          | 17.4            | 2.74                    | 15.4                      | 3.07          | 21.5                      | 2.83                    | 20.8                      | 3.12          | 15.4             |
|                                | 11            | 0.68            | 23.8                      | 0.14          | 14.2            | 0.61                    | 16.2                      | 0.30          | 12.3                      | 0.51                    | 14.4                      | 0.53          | 10.1             |
|                                | <b>Median</b> | <b>0.95</b>     | <b>21.8</b>               | <b>1.2</b>    | <b>15.8</b>     | <b>0.63</b>             | <b>15.8</b>               | <b>1.34</b>   | <b>21.5</b>               | <b>1.31</b>             | <b>20.8</b>               | <b>1.25</b>   | <b>13.7</b>      |
| <b>Prior dinutuximab mAb</b>   |               |                 |                           |               |                 |                         |                           |               |                           |                         |                           |               |                  |
|                                | 4             | 0.14            | 16.7                      | 0.15          | 13.8            | 0.08                    | 21.7                      | 0.05          | 19.6                      | 0.47                    | 21.1                      | N/A           | N/A              |
|                                | 7             | 0.21            | 21.7                      | N/A           | N/A             | N/A                     | N/A                       | N/A           | N/A                       | N/A                     | N/A                       | N/A           | N/A              |
|                                | *9            | 0.18            | 20.6                      | 0.44          | 24.5            | 0                       | 29.1                      | 0.27          | 33.6                      | 0.91                    | 15.7                      | 0.13          | 17.9             |
|                                | 10            | 0               | 12.5                      | 0             | 31.7            | 0                       | 30.6                      | 0             | 12.3                      | 0                       | 18.7                      | 0             | 24.5             |
|                                | 12            | 0.04            | 13.5                      | 0.17          | 20.1            | 0.27                    | 23.7                      | 0             | 31.9                      | 0.07                    | 40.0                      | 0.17          | 15.1             |
|                                | 13            | 1.16            | 10.1                      | 0.36          | 20.4            | 0.28                    | 18.5                      | 0.23          | 32.0                      | 0.09                    | 24.2                      | 0.12          | N/A              |
|                                | <b>Median</b> | <b>0.16</b>     | <b>15.1</b>               | <b>0.17</b>   | <b>20.1</b>     | <b>0.08</b>             | <b>23.7</b>               | <b>0.05</b>   | <b>31.9</b>               | <b>0.09</b>             | <b>21.1</b>               | <b>0.13</b>   | <b>15.1</b>      |
| <b>Prior hu14.18 K322A mAb</b> |               |                 |                           |               |                 |                         |                           |               |                           |                         |                           |               |                  |
|                                | *1            | 1.14            | 25.2                      | 1.32          | 18.3            | 1.64                    | 17.6                      | 2.14          | 2.1                       | 1.30                    | 16.3                      | 2.53          | 20.0             |
|                                | 3             | 1.55            | 17.0                      | N/A           | N/A             | N/A                     | N/A                       | N/A           | N/A                       | N/A                     | N/A                       | N/A           | N/A              |
|                                | 8             | 0.80            | 21.6                      | 0             | 3.5             | 0                       | 20.4                      | 0.40          | 20.9                      | N/A                     | N/A                       | N/A           | N/A              |
|                                | <b>Median</b> | <b>1.14</b>     | <b>21.6</b>               | <b>0.66</b>   | <b>10.9</b>     | <b>0.82</b>             | <b>19.0</b>               | <b>1.27</b>   | <b>11.5</b>               | <b>N/A</b>              | <b>N/A</b>                | <b>N/A</b>    | <b>N/A</b>       |
| <b>All patients combined</b>   |               |                 |                           |               |                 |                         |                           |               |                           |                         |                           |               |                  |
|                                | <b>Median</b> | <b>0.18</b>     | <b>20.6</b>               | <b>0.17</b>   | <b>18.3</b>     | <b>0.27</b>             | <b>18.5</b>               | <b>0.25</b>   | <b>21.2</b>               | <b>0.51</b>             | <b>20.8</b>               | <b>0.35</b>   | <b>15.4</b>      |
|                                | <b>Range</b>  | <b>0 - 3.01</b> | <b>4.2-25.2</b>           | <b>0-2.36</b> | <b>3.5-31.7</b> | <b>0-2.74</b>           | <b>8.3-30.6</b>           | <b>0-3.07</b> | <b>2.1-35.5</b>           | <b>0-2.83</b>           | <b>14.4-40.0</b>          | <b>0-3.12</b> | <b>10.1-24.5</b> |

Patient groups sorted by prior antibody treatment. Pre HAHA - Human anti human antibody (HAHA) level measured in hu14.18K322A bridge ELISA assay prior to each course. Values represent optical density readings; peak K322A - hu14.18K322A is the serum concentration of hu14.18K322A determined in ELISA as micrograms/ml serum in sample obtained 1 hr following completion of the initial 4 hr infusion of antibody for the indicated course. \* Denotes patients with an increase HAHA greater than 0.7 OD units from baseline.
