# Supplementary material
Source: PubMed Central journal article supplement (PMC8725652)
Supplement: NIHMS1557085-supplement-table_4.pdf [file NIHMS1557085-supplement-table_4.pdf]

**Supplementary table 4.** ADCC EC50 values of hu14.18K322A and dinutuximab

| Lot No.             | EC50<br>(ng/mL) | R <sup>2</sup> | Std Error | Std<br>Dev   | %<br>Fucoslyation |
|---------------------|-----------------|----------------|-----------|--------------|-------------------|
| <b>Hu14.18K322A</b> |                 |                |           |              |                   |
| 09-014              | 2.021           | 0.999          | 0.409     |              | 43.36             |
| 13-038              | 2.144           | 0.999          | 0.436     |              | 35.43             |
| 13-069              | 2.757           | 0.998          | 0.537     |              | 38.56             |
| 14-058              | 2.040           | 0.999          | 0.308     |              | 37.17             |
| 15-024              | 1.924           | 1.000          | 0.146     |              | 42.27             |
| <b>Average</b>      | <b>2.157</b>    |                |           | <b>0.303</b> |                   |
| <b>Dinutuximab</b>  |                 |                |           |              |                   |
| 2100691             | 8.681           | 1.000          | 0.415     |              | ~100              |
| 2100998             | 8.091           | 1.000          | 0.526     |              | ~100              |
| <b>Average</b>      | <b>8.386</b>    |                |           | <b>0.295</b> |                   |
